# Supplementary material
Source: MDPI journal article supplement (https://www.mdpi.com/2571-9408/4/3/125)

## **Supporting Information**

### **Max Ernst's *Woman, Old Man, and Flower* (1923–24): a painting in four states revealed by technical imaging**

Ana Martins, Ellen Davis and Talia Kwartler

*The David Booth Conservation Department, The Museum of Modern Art, 11 W 53rd Street, New York, 10019 NY, USA*

---

**Figure S1:** Elemental distribution maps obtained by MAXRF for the most abundant chemical elements: Zn, Pb, Fe, Cu, As, Cr, Ca and Co.

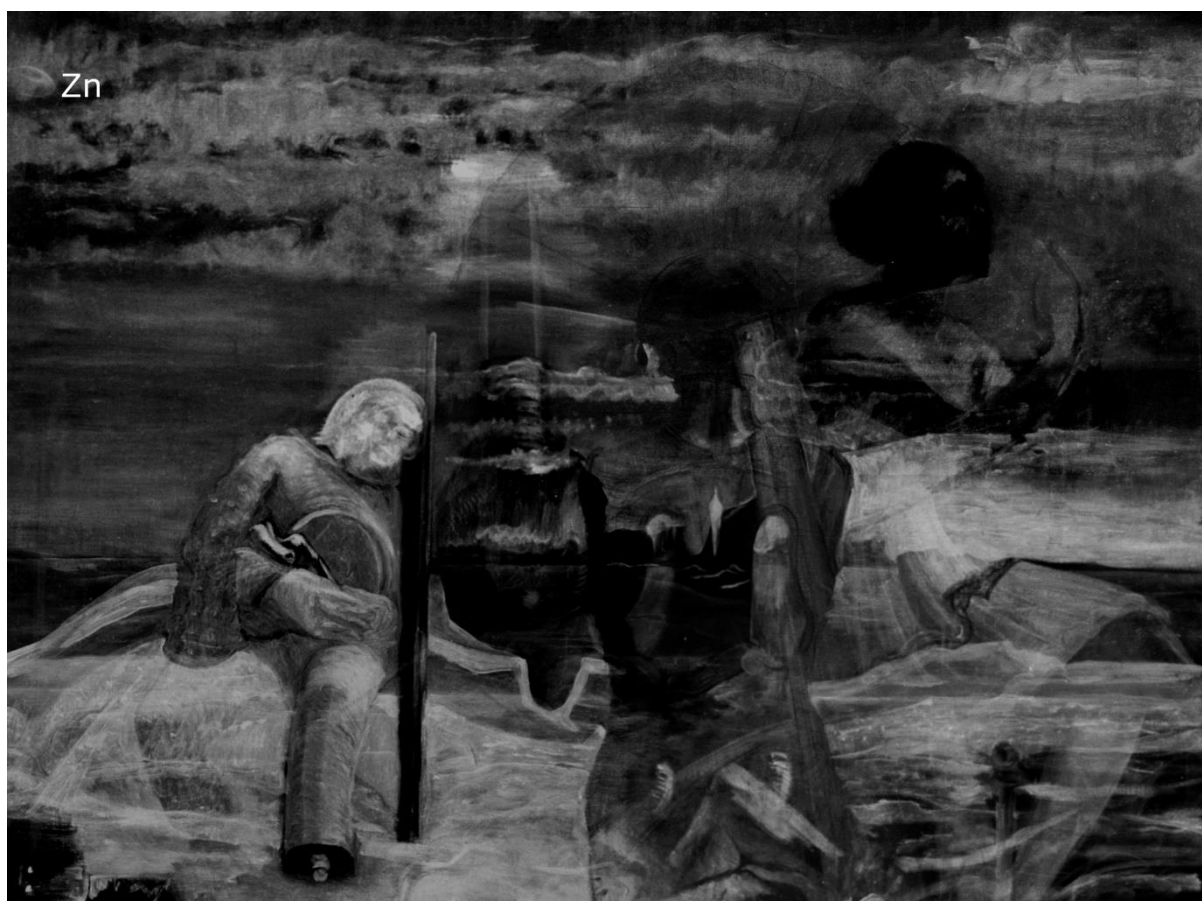

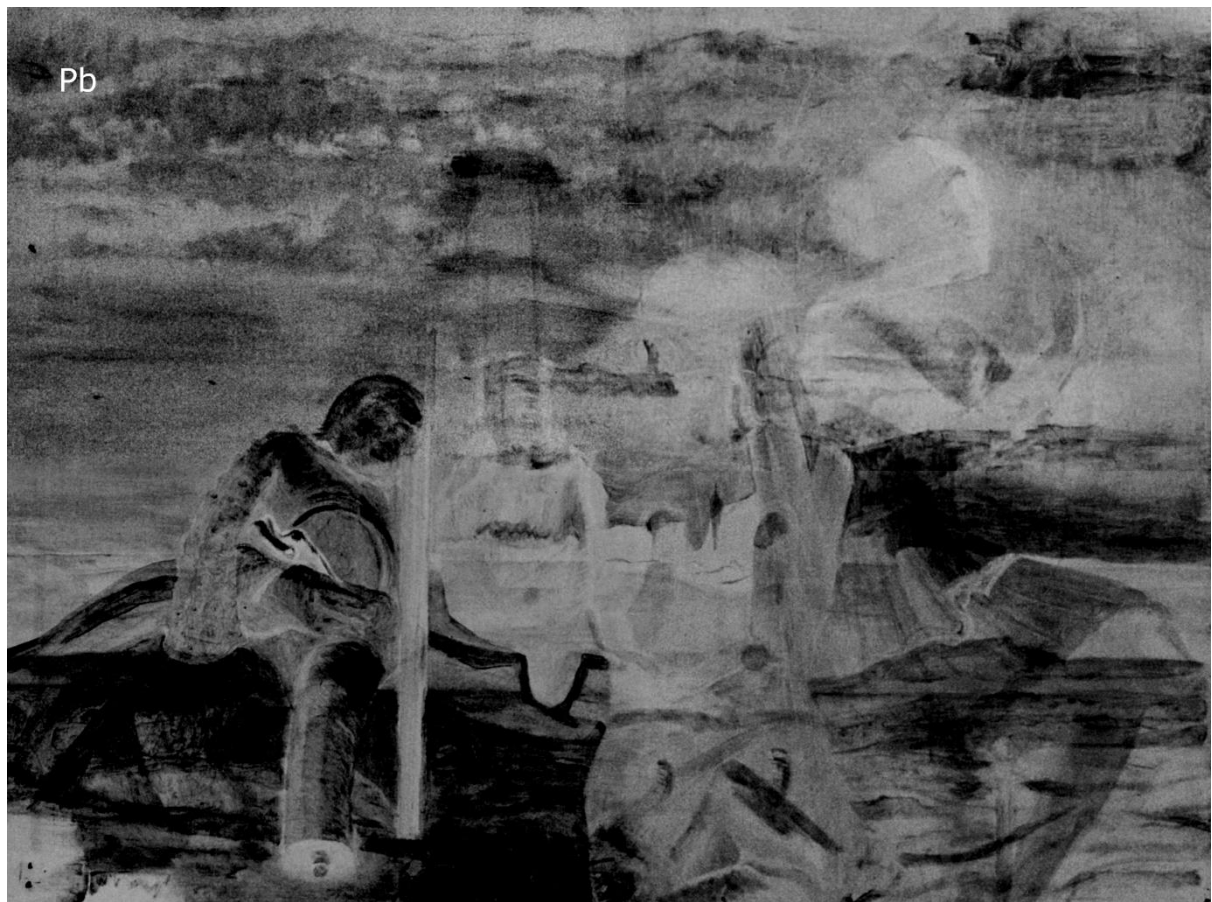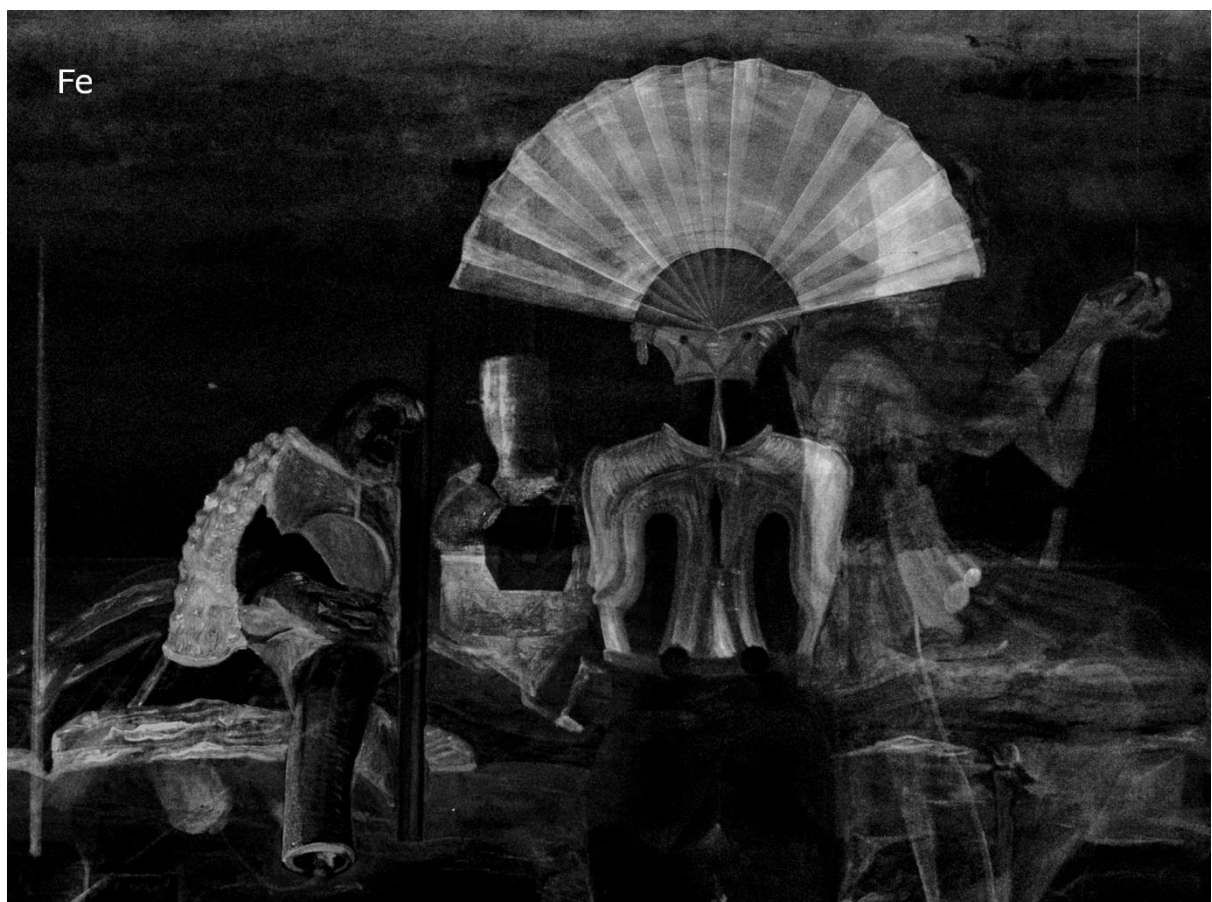

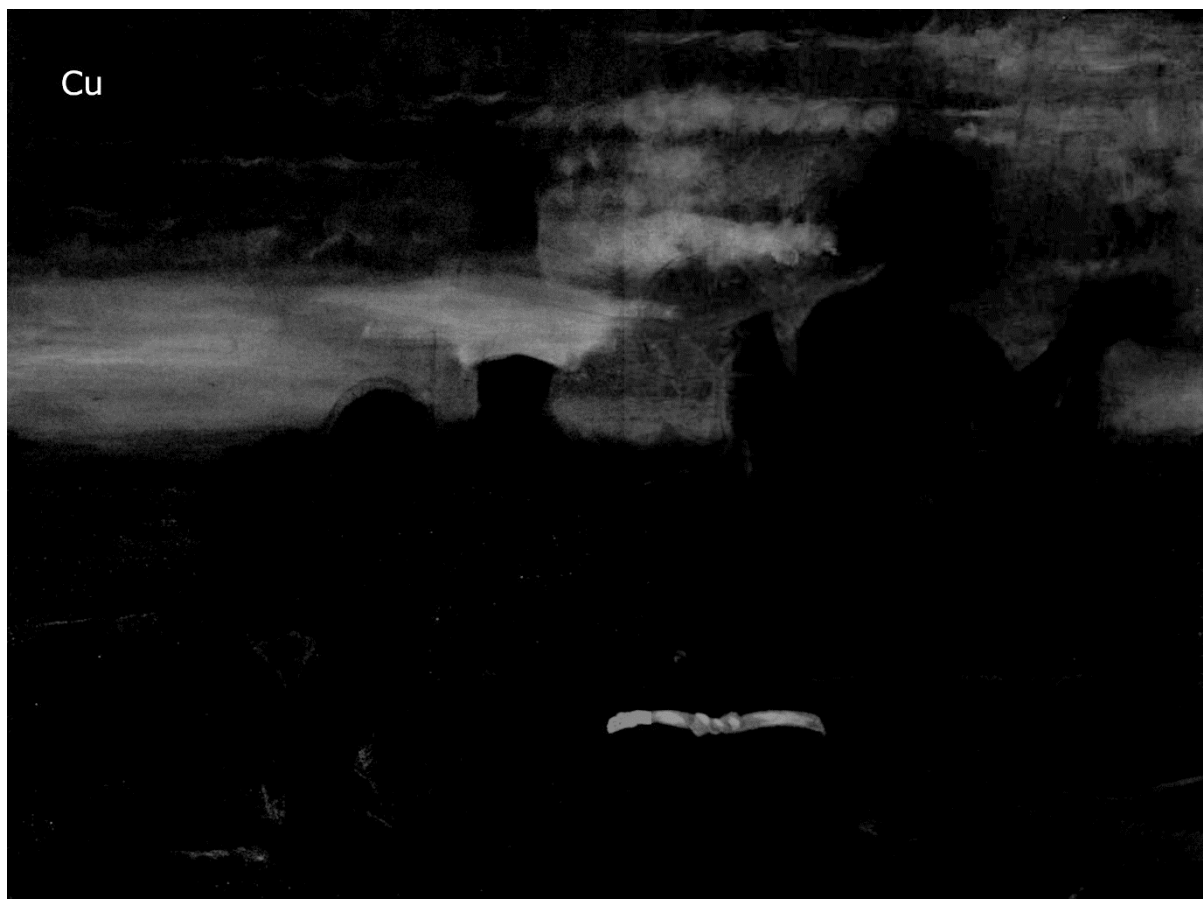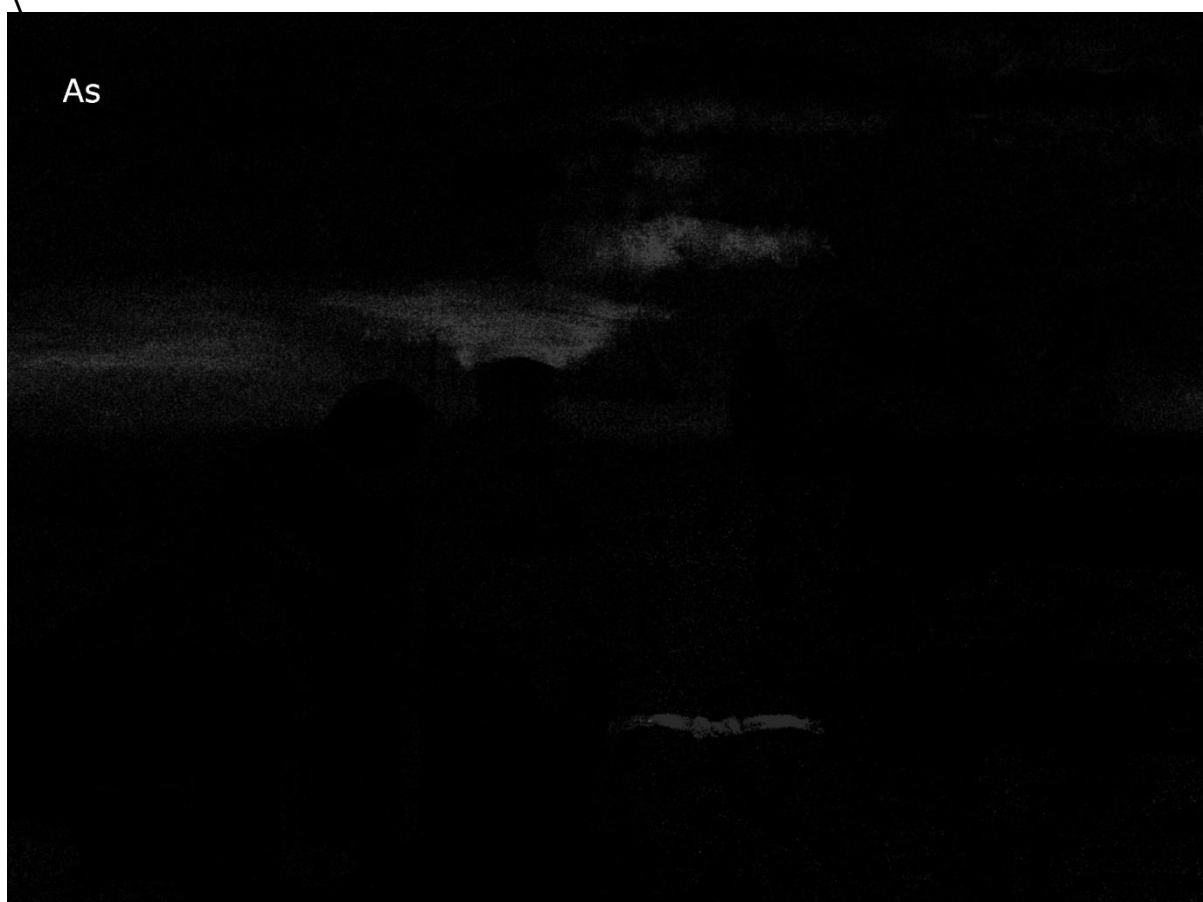

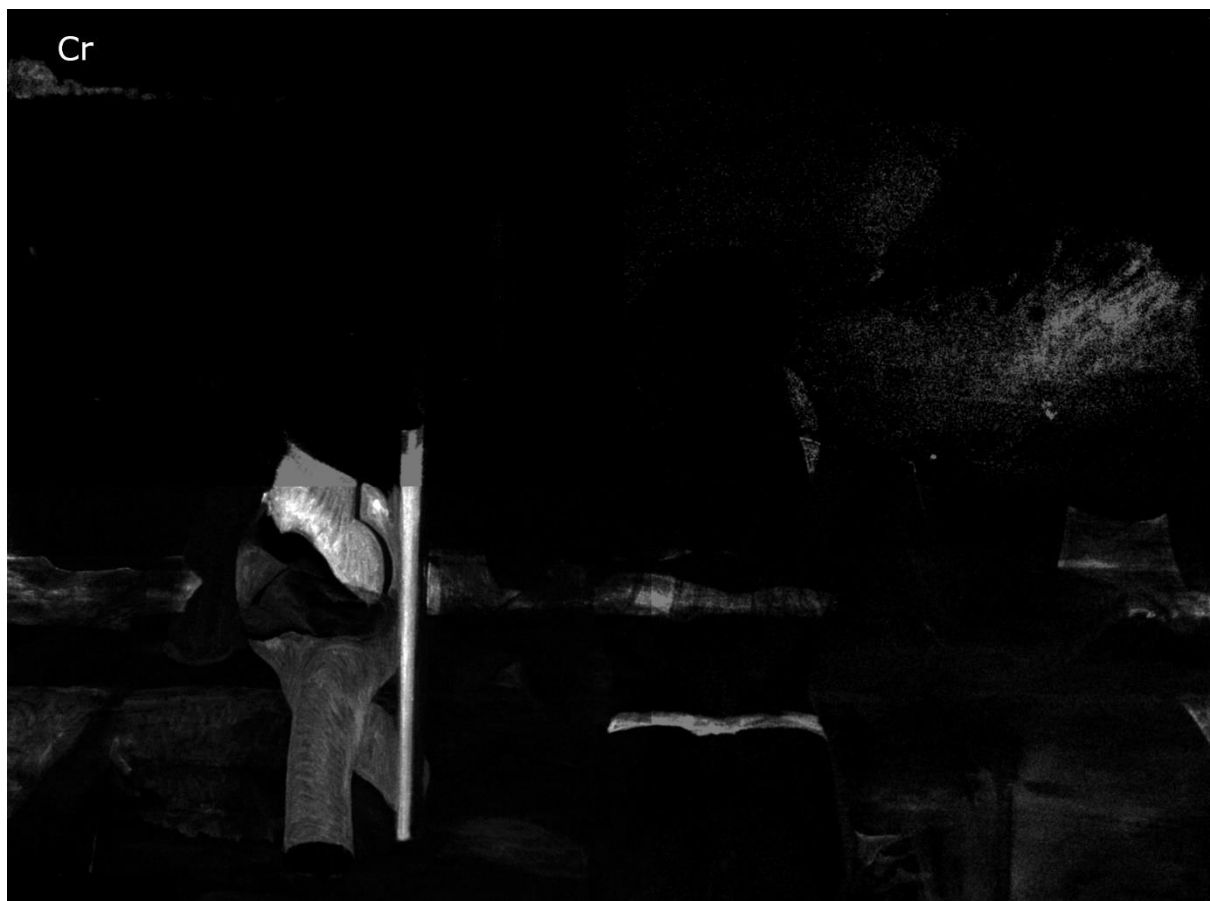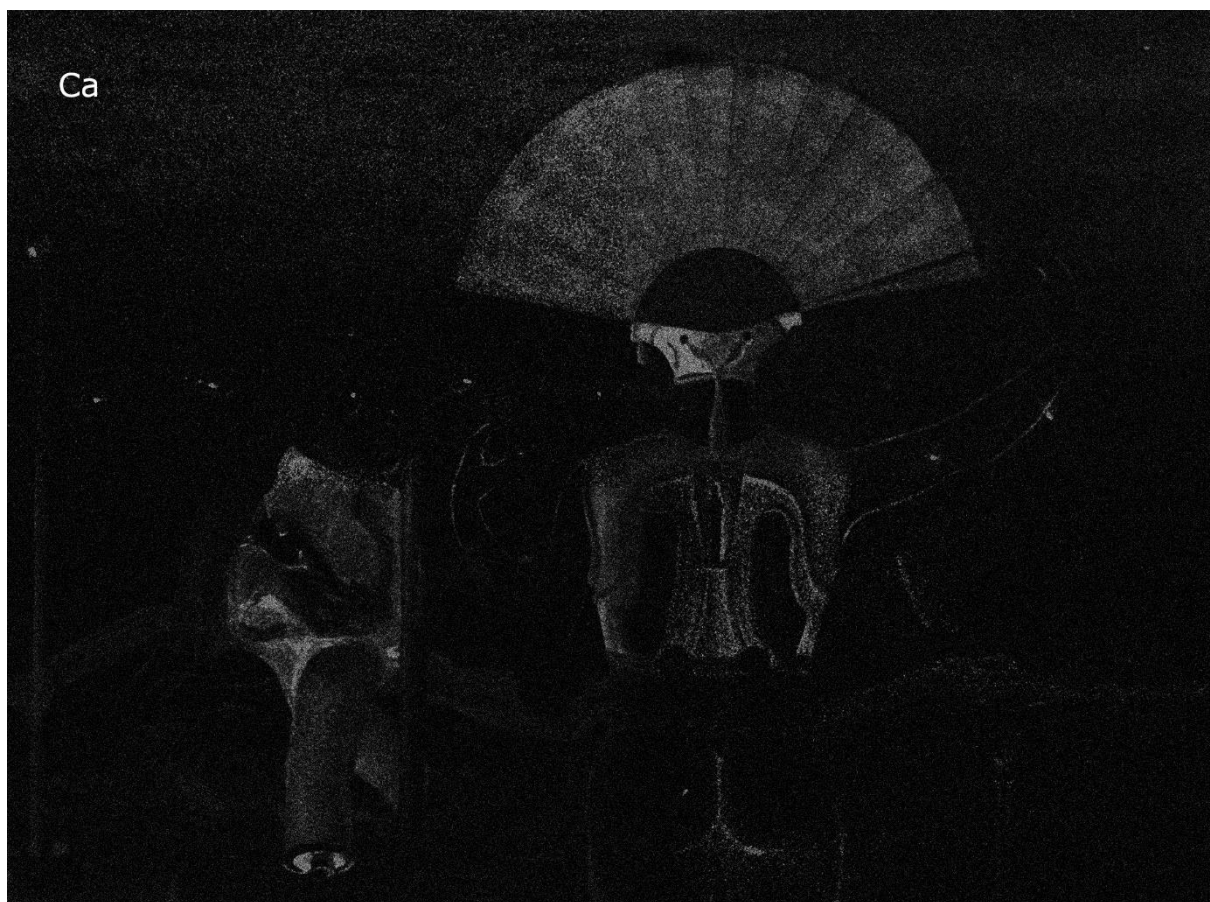

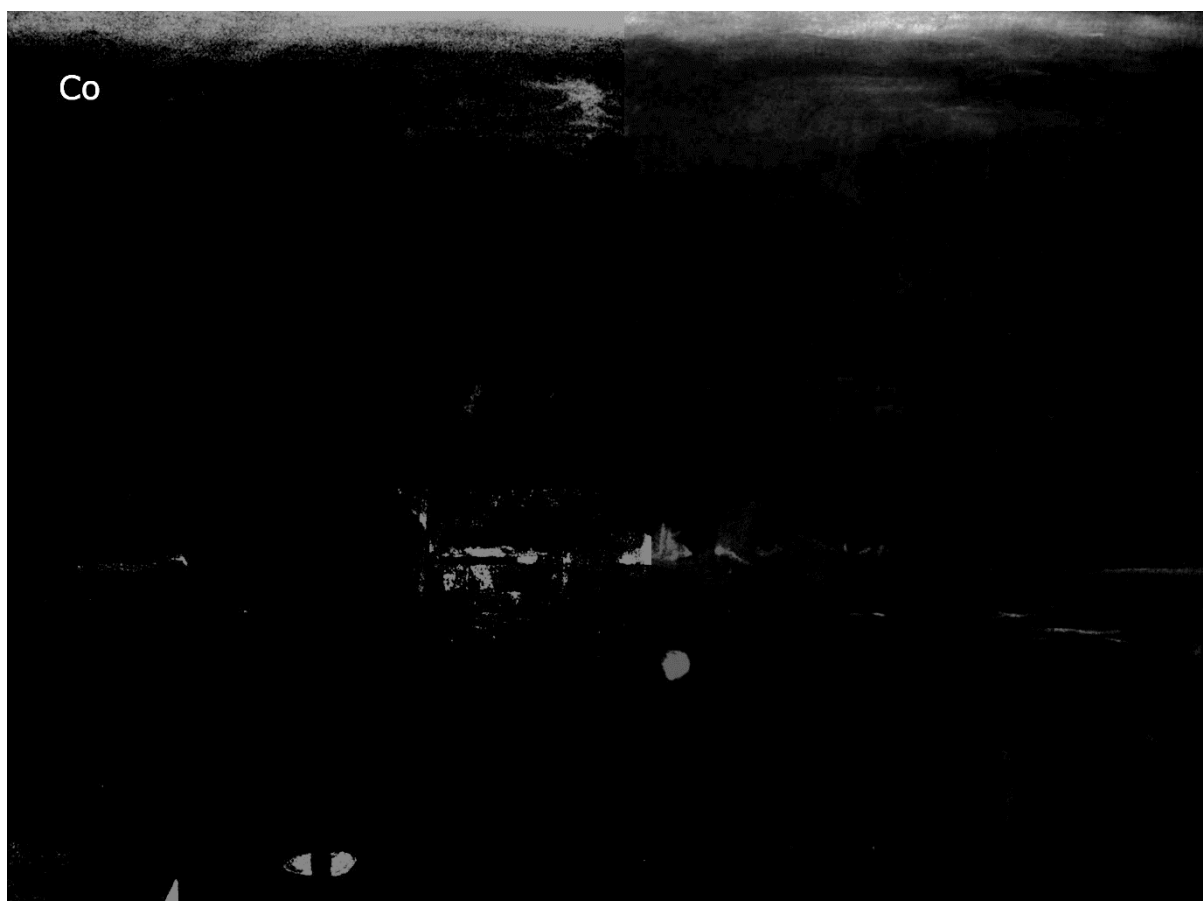

**Figure S2:** Selection of pigment distribution maps obtained by MCR-ALS processing of the MAXRF data: zinc white, lead white, iron oxides, emerald green, bone black, chromium based green, cobalt blue, cadmium yellow, cadmium red and vermillion.



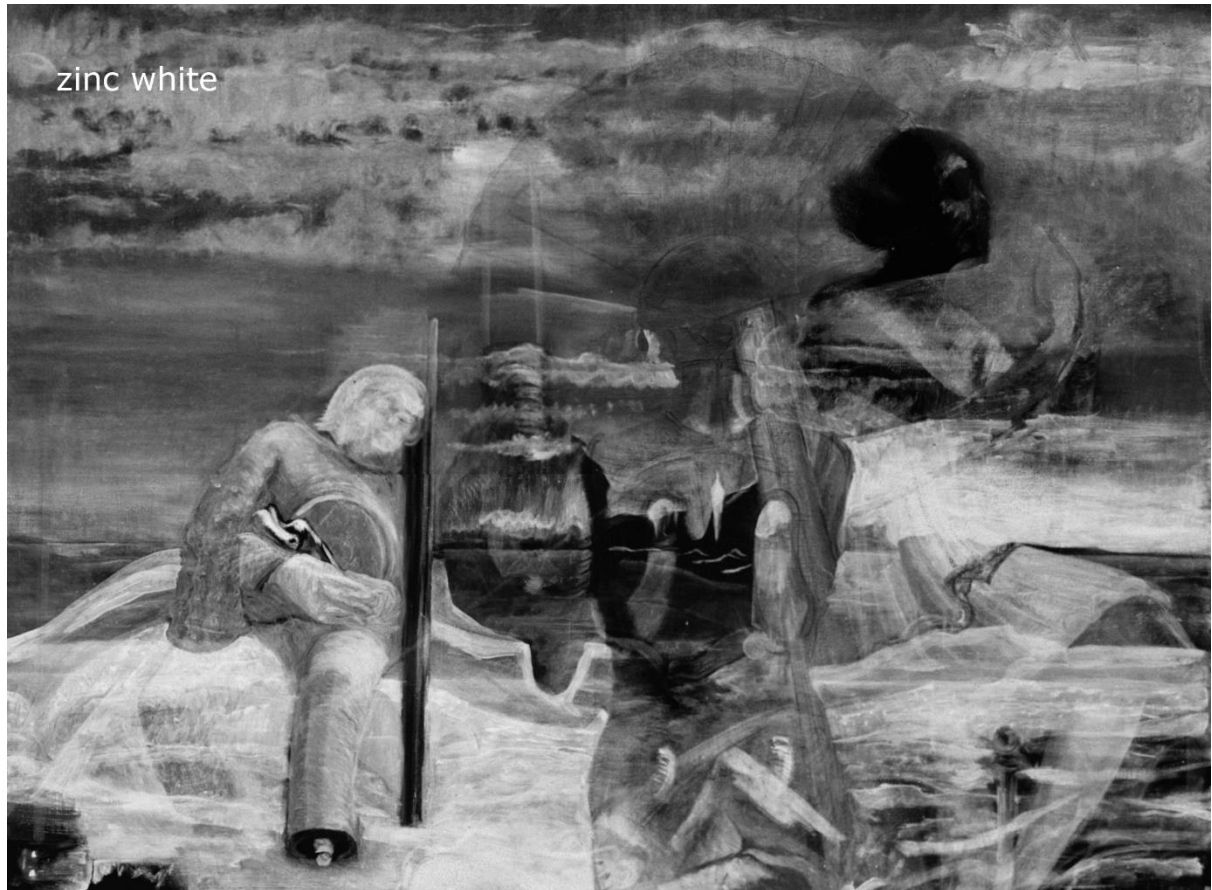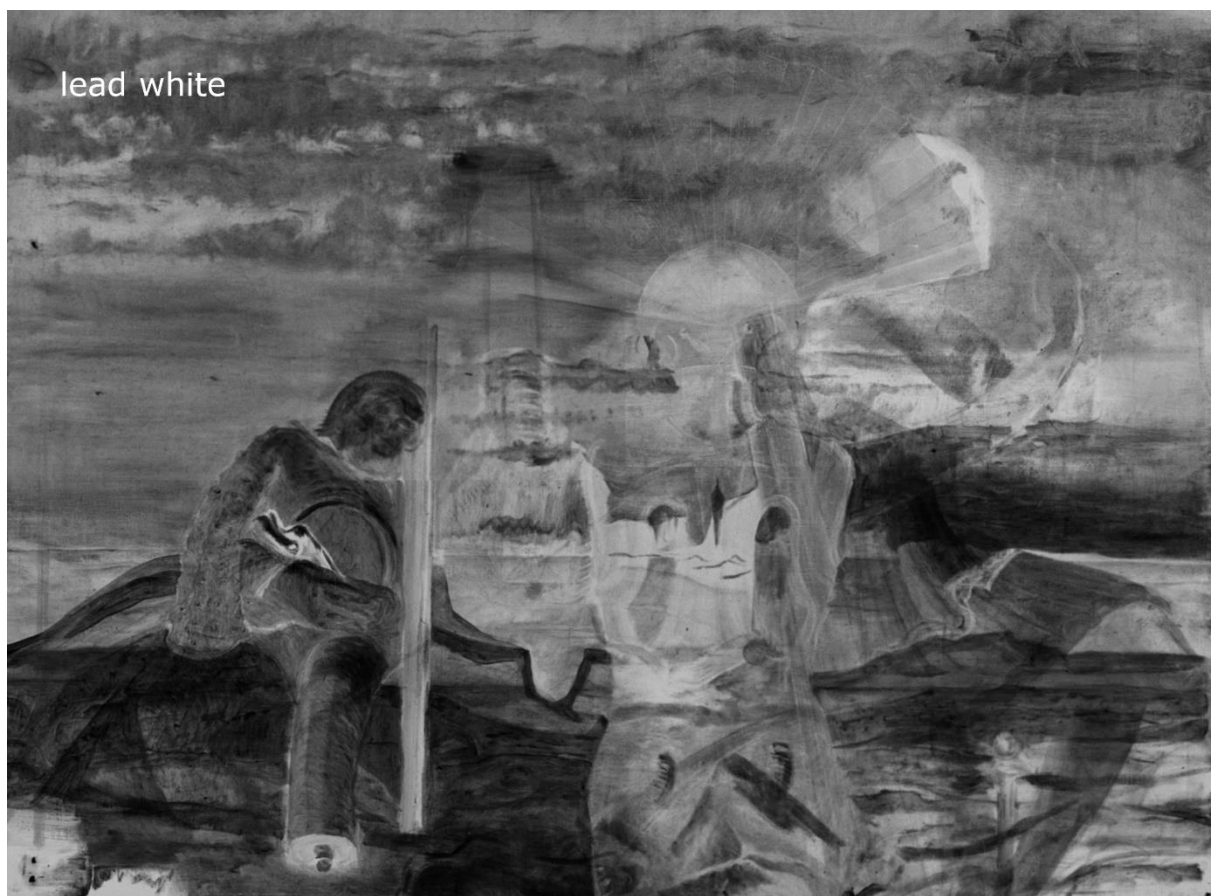

iron oxides

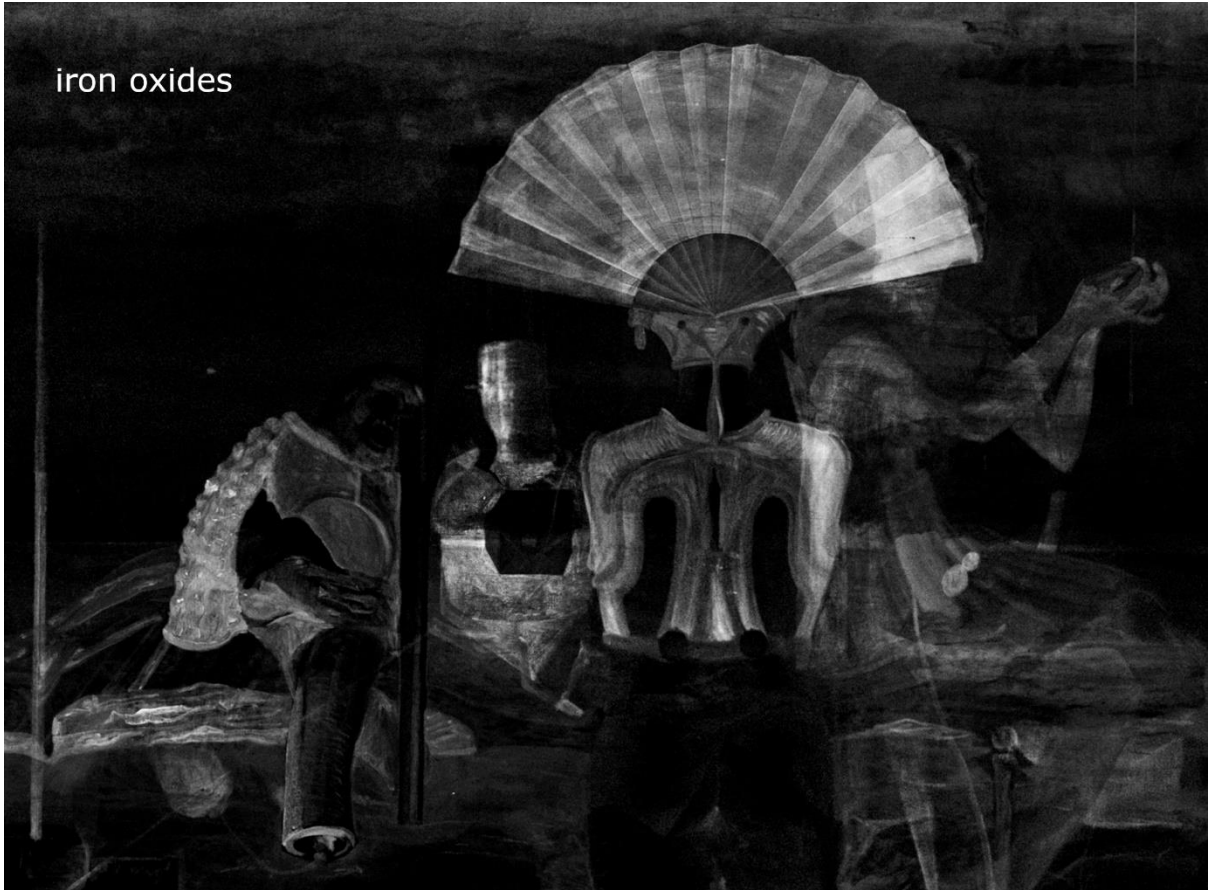

emerald green

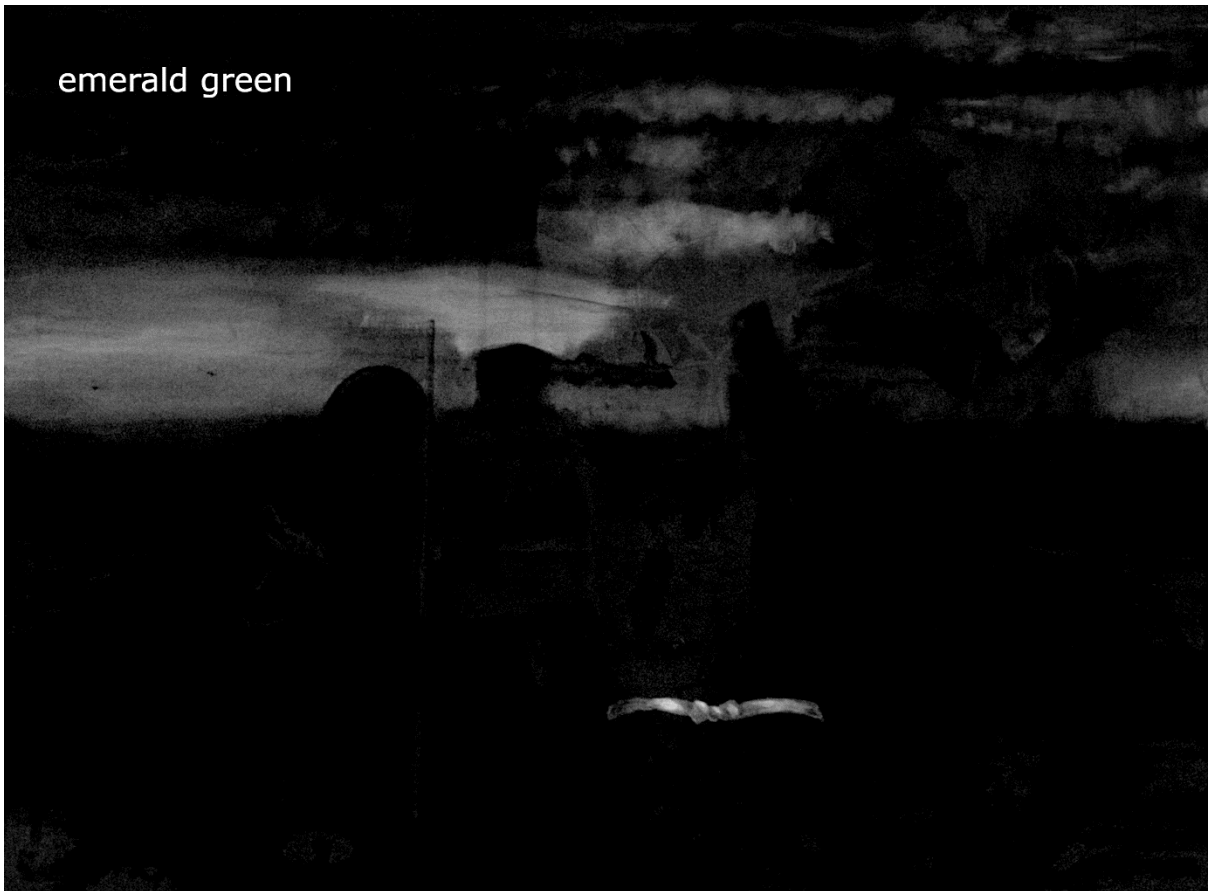

bone black  
*(and conservation intervention)*

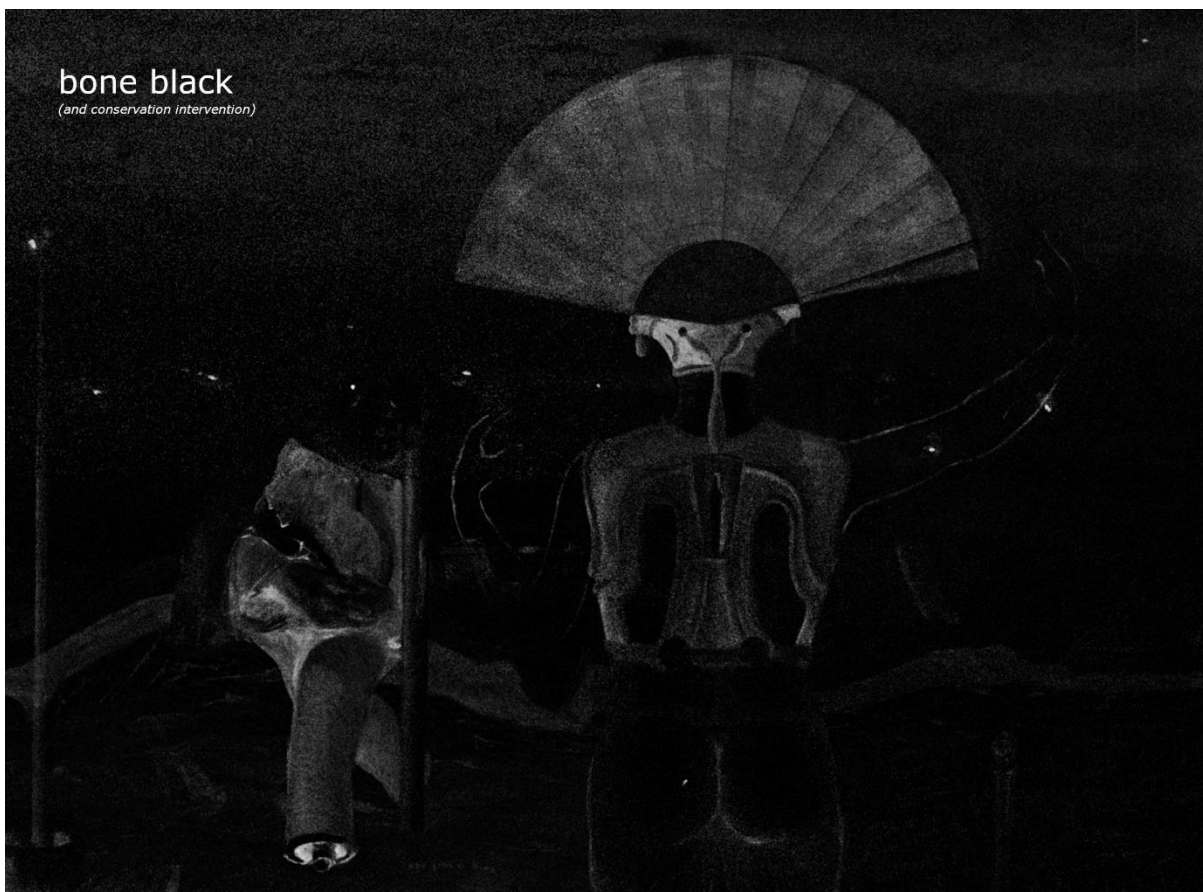

chrome based green

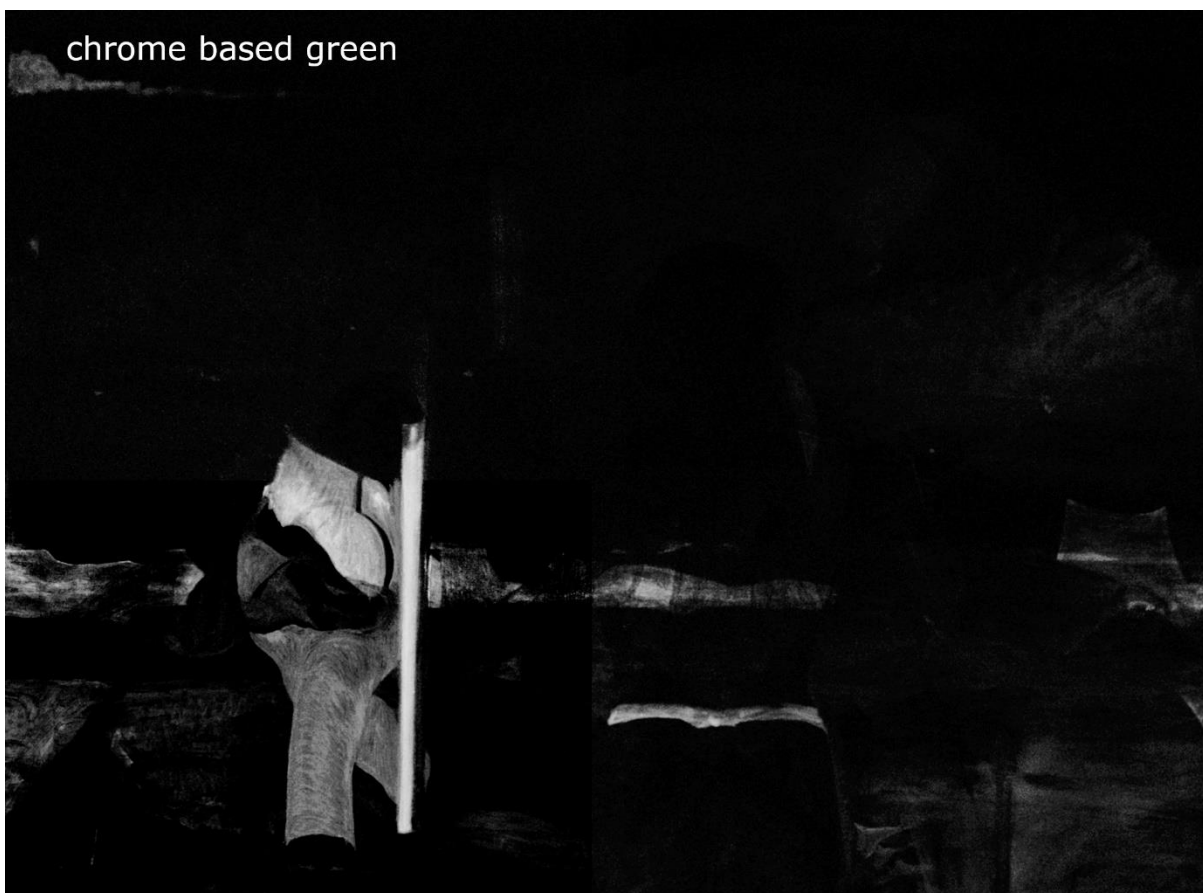



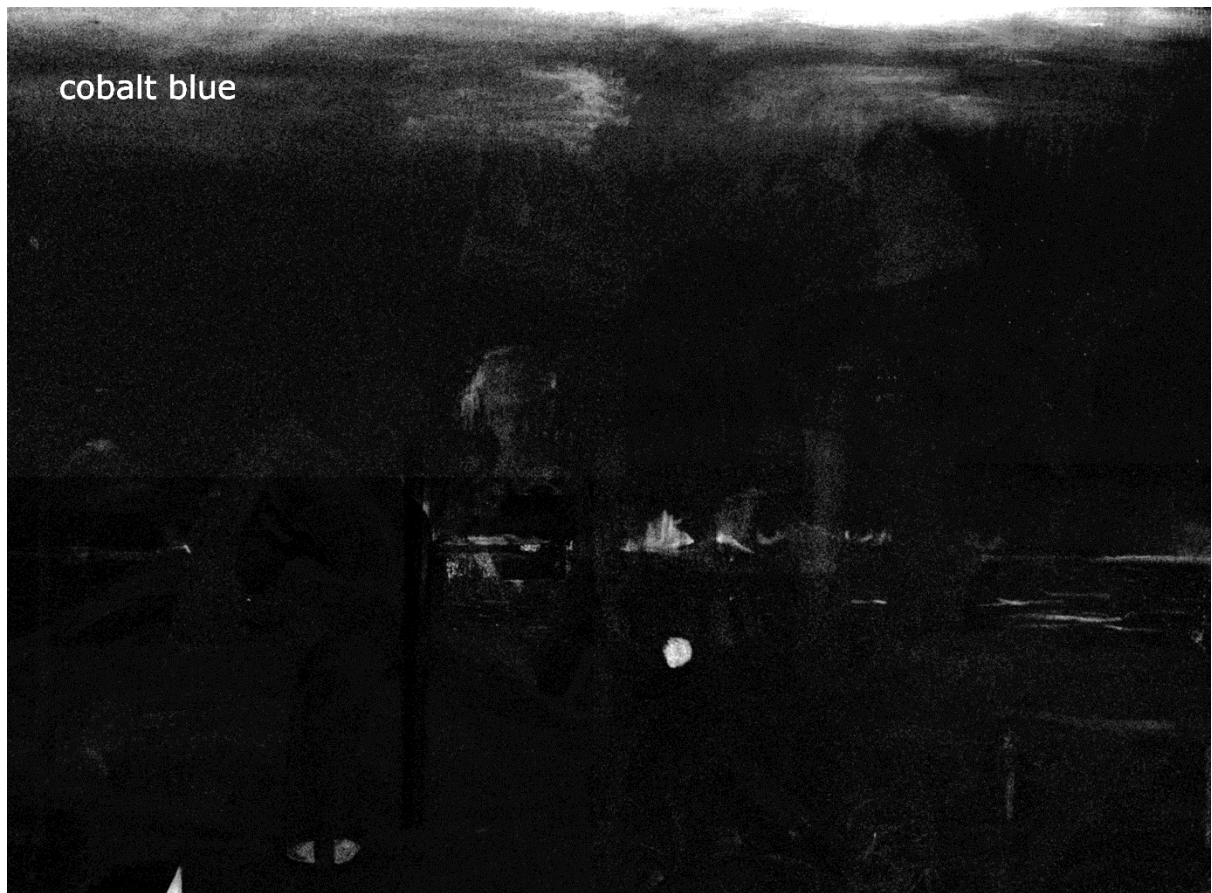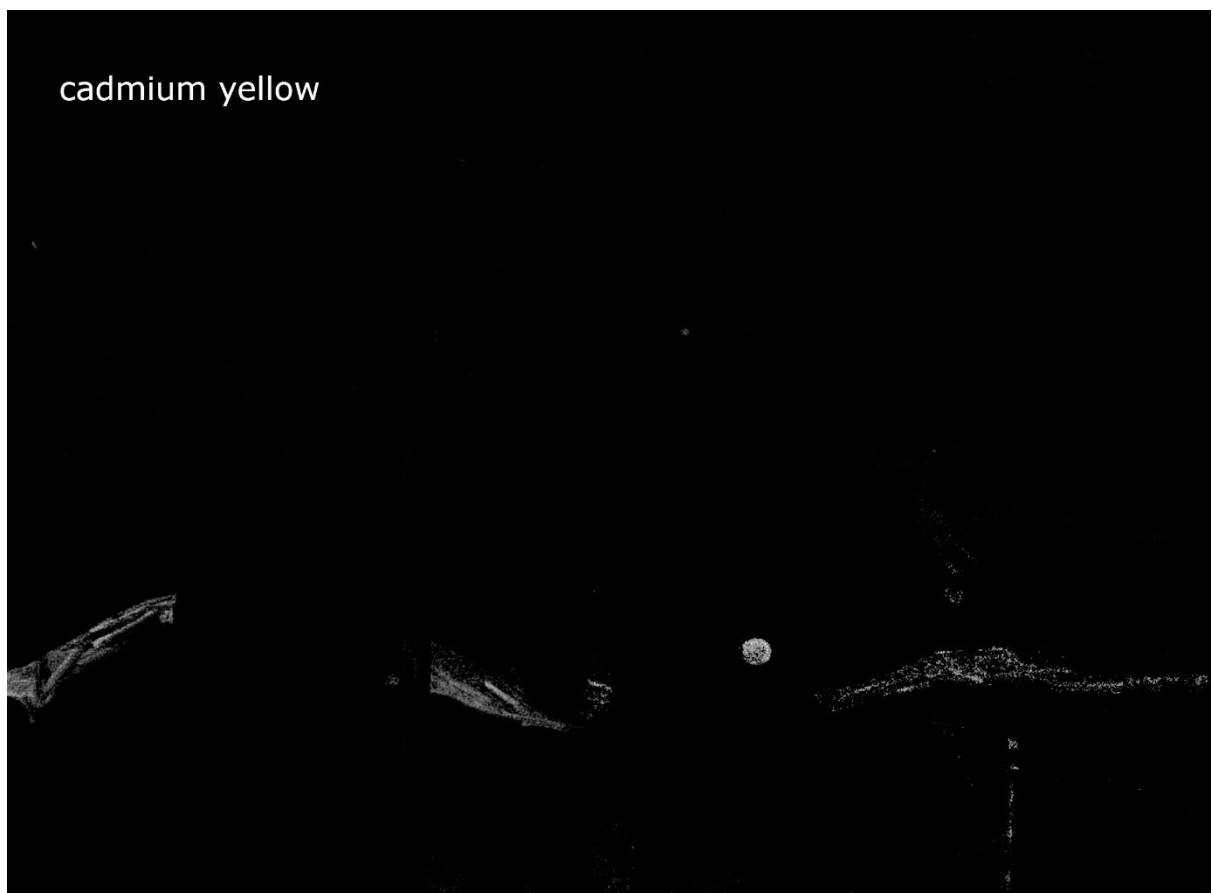

cadmium red

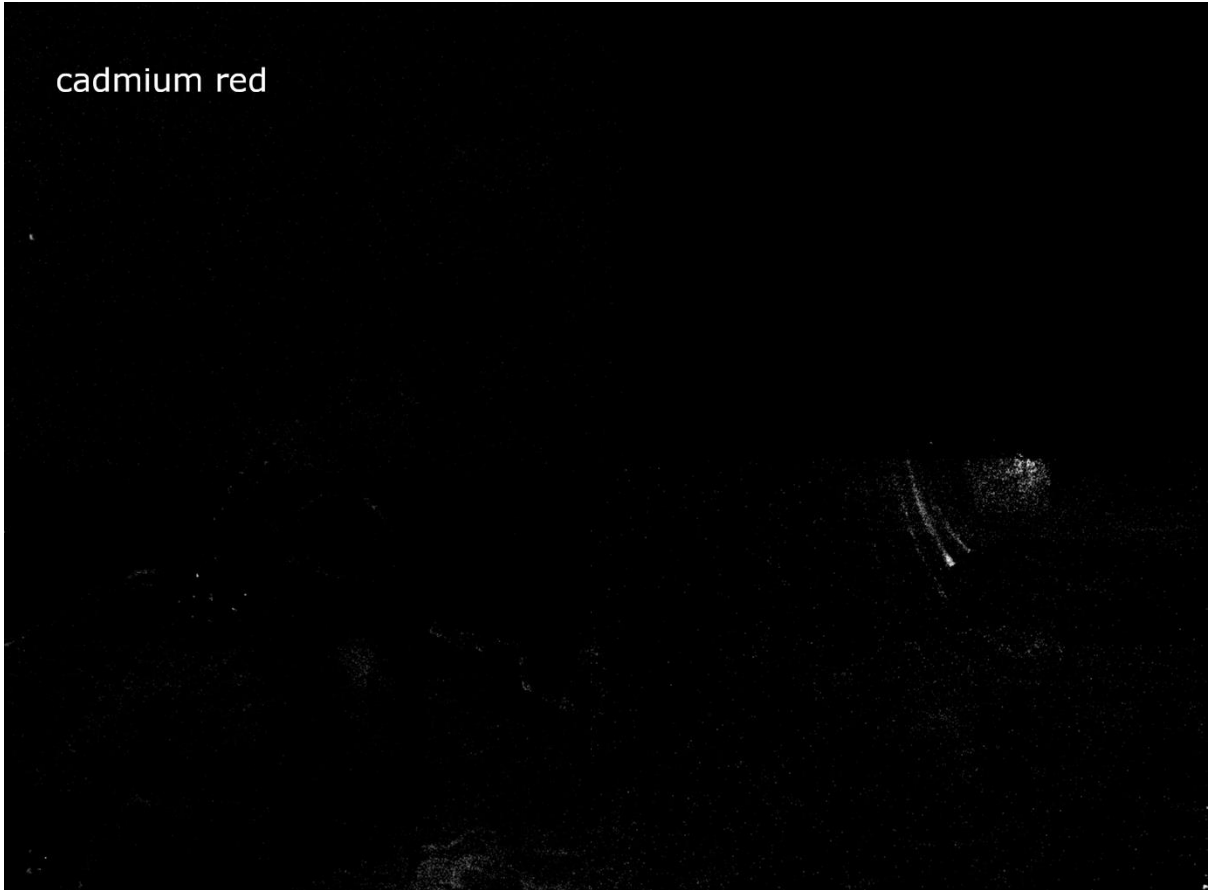

vermilion

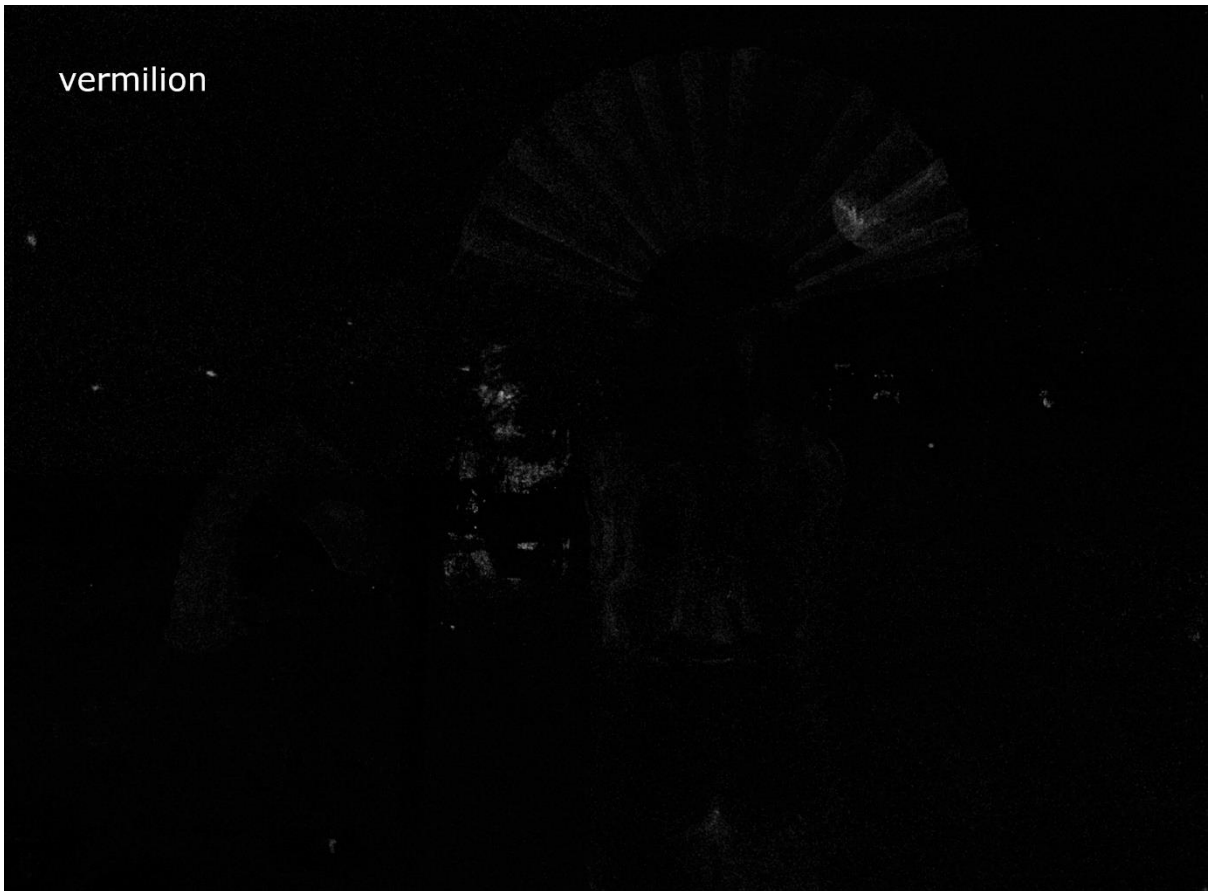

Supplement: s1 [file s1]
